# Supplementary material for: Improving Engagement in Behavioral and Mental Health Services Through Animal-Assisted Interventions: A Scoping Review
Source: Atypon-hosted journal article supplement (doi:10.1176/appi.ps.202000585), 2021-06-23
Supplement: appi.ps.202000585.ds001.pdf [file appi.ps.202000585.ds001.pdf]

Identification

Records identified through  
database searching  
(n = 1,521)

Additional records identified  
through other sources  
(n = 0)

Screening

Duplicates removed  
(n = 189)

Records screened  
(n = 1,343)

Records excluded  
(n = 1,311)  
Did not reference the  
research topic

Eligibility

Full-text articles  
assessed for eligibility  
(n = 32)

Full-text articles  
excluded  
(n = 22)  
Did not include a mental  
health service  
AAI used a non-live or  
non-domesticated

Included

Studies included in  
qualitative synthesis  
(n = 10)
